# Supplementary material
Source: PubMed Central journal article supplement (PMC2851796)
Supplement: 1001576107_pnas.201001576SI.pdf [file 1001576107_pnas.201001576SI.pdf]

# Supporting Information

Brzeska et al. 10.1073/pnas.1001576107

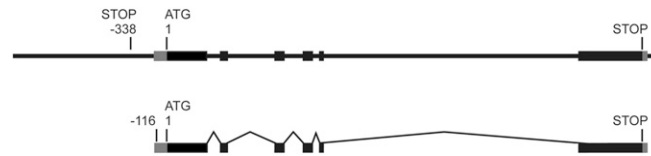

**Fig. S1.** A schematic representation of the longest *cbbp* cDNA recovered in the yeast one-hybrid screening (*Lower*) with corresponding genomic DNA (*Upper*). Exons are indicated as thick boxes. First ATG codon and nearest upstream STOP codon in the genomic DNA are indicated. There is no in-frame ATG codon in between. STOP codon present in the CBBP cDNA is also indicated. Putative 5' UTR and 3' UTR are indicated in gray.

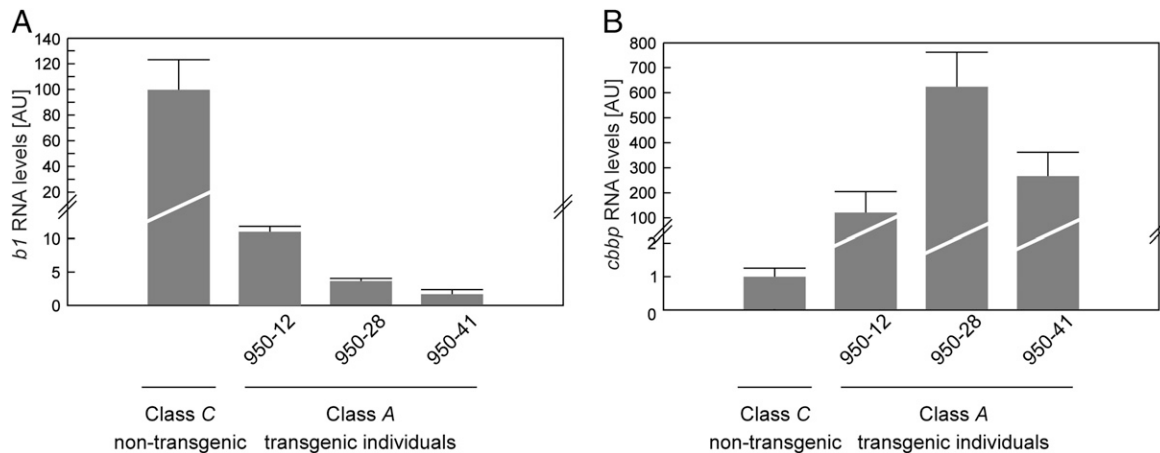

**Fig. S2.** (A) Expression of *b1* in transgenic *FLAG-cbbp* plants. *b1* transcript levels in three class A individuals and a nontransgenic class C sibling were analyzed by quantitative RT-PCR. Results were normalized to *actin*, and transcript levels are shown in arbitrary units (AU). Mean values from three technical replicates are shown with error bars indicating SD. (B) Total *cbbp* RNA levels in the same class A and class C nontransgenic plants as shown in A. Results were normalized to *actin*, and transcript levels are shown in AU. Mean values from three technical replicates are shown with error bars indicating SD.

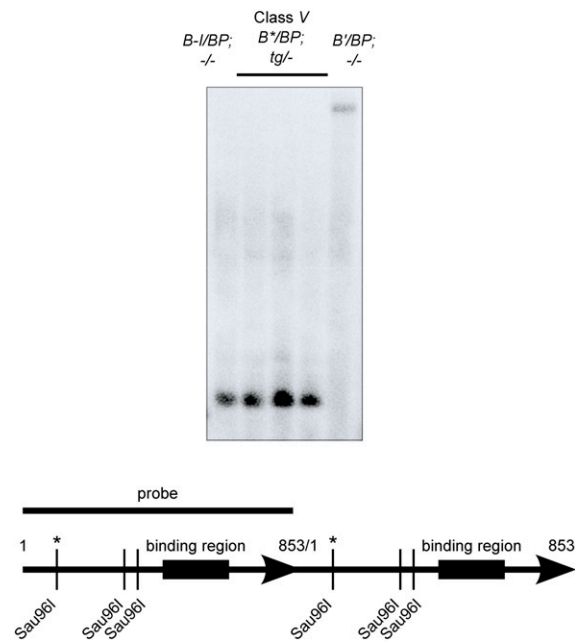

**Fig. S3.** DNA methylation analysis on Sau96-I site in *b1* repeats. DNA samples extracted from *B-I/B-Peru*, *B'/B-Peru* and three class *V* (*B\*/B-P*; *tg*<sup>-/-</sup>, see Fig. 4) plants that showed silencing were digested with Sau96-I DNA methylation sensitive enzyme. Digested DNA was analyzed by Southern blot with the probe corresponding to the full-length repeat unit. The probe position and Sau96-I sites relative to the repeats are diagramed below the blot. The Sau96-I sites that are differentially methylated in *B-I* and *B'* are indicated by asterisks. The two other Sau96-I sites are usually methylated in both epialleles. Only two repeat units are shown.

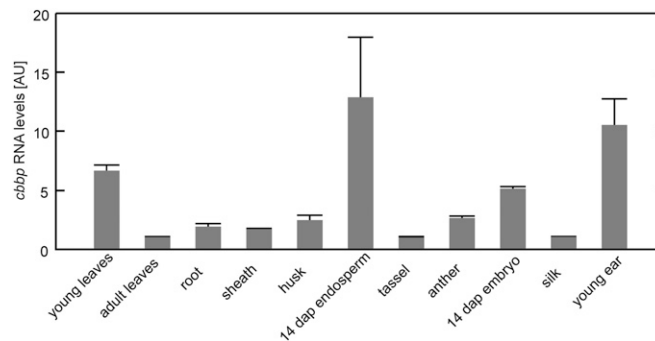

**Fig. S4.** RNA levels of *cbbp* in different tissues. Total RNA samples extracted from different tissues of the B73 genotype were analyzed by quantitative RT-PCR with primers specific to *cbbp*. Results were normalized to *actin*. RNA levels shown in arbitrary units (AU). Mean values from three technical replicates are shown with error bars indicating SD.

**Table S1. FLAG-*cbbp* transgene correlates with *B-I* silencing**

| Family | Class A<br>transgenic plants |                                      | Class C<br>nontransgenic plants |                        |
|--------|------------------------------|--------------------------------------|---------------------------------|------------------------|
|        | <i>B-I</i><br>phenotype      | <i>B*</i> and <i>B'</i><br>phenotype | <i>B-I</i><br>phenotype         | <i>B'</i><br>phenotype |
| V950   | 0                            | 22                                   | 26                              | 0                      |
| V952   | 4                            | 10                                   | 19                              | 1                      |
| V954   | 0                            | 3                                    | 3                               | 0                      |
| V956   | 4                            | 3                                    | 3                               | 0                      |
| V1351  | 0                            | 3                                    | 5                               | 0                      |
| V1353  | 0                            | 5                                    | 2                               | 0                      |
| V1355  | 0                            | 4                                    | 6                               | 0                      |
| V1357  | 1                            | 4                                    | 4                               | 0                      |
| V1361  | 0                            | 1                                    | 3                               | 0                      |
